# Supplementary material for: Prevention of psychosocial distress consequences in somatic hospital inpatients via a stepped and collaborative care model: protocol of SomPsyNet, a stepped wedge cluster randomised trial
Source: PubMed Central journal article supplement — BMJ Open. 2023 Nov 23;13(11):e076814. doi: 10.1136/bmjopen-2023-076814 (PMC10668178; doi:10.1136/bmjopen-2023-076814), 2023-11-23
Supplement: bmjopen-2023-076814supp001.pdf [file bmjopen-2023-076814supp001.pdf]

## SUPPLEMENTARY MATERIAL

- Supplementary material 1: Figure – Schedule of SomPsyNet stepped-wedge cluster randomised trial
- Supplementary material 2: Methodological details 1 – Time periods, sequences, sequence generation, allocation of sequences, concealment mechanism, implementation, and blinding
- Supplementary material 3: Table – SomPsyNet study clusters
- Supplementary material 4: BAK-list (provided in German)
- Supplementary material 5: Methodological details 2 – Intervention
- Supplementary material 6: Methodological details 3 – Primary, secondary, and other outcomes, including healthcare economic outcomes
- Supplementary material 7: Informed consent materials (provided in German)
- Supplementary material 8: Methodological details 4 – Data recording and source data
- Supplementary material 9: Methodological details 5 – Statistics
- Supplementary material 10: Table – Causality assessment of Serious Adverse Events (SAEs) based on International Council for Harmonisation of Technical Requirements for Pharmaceuticals for Human Use (ICH) E2A guidelines
- Supplementary material 11: Methodological details 6 – Ethics and dissemination
- Supplementary material 12: References of the Supplementary material

**Supplementary material 1: Figure – Schedule of SomPsyNet stepped-wedge cluster randomised trial**

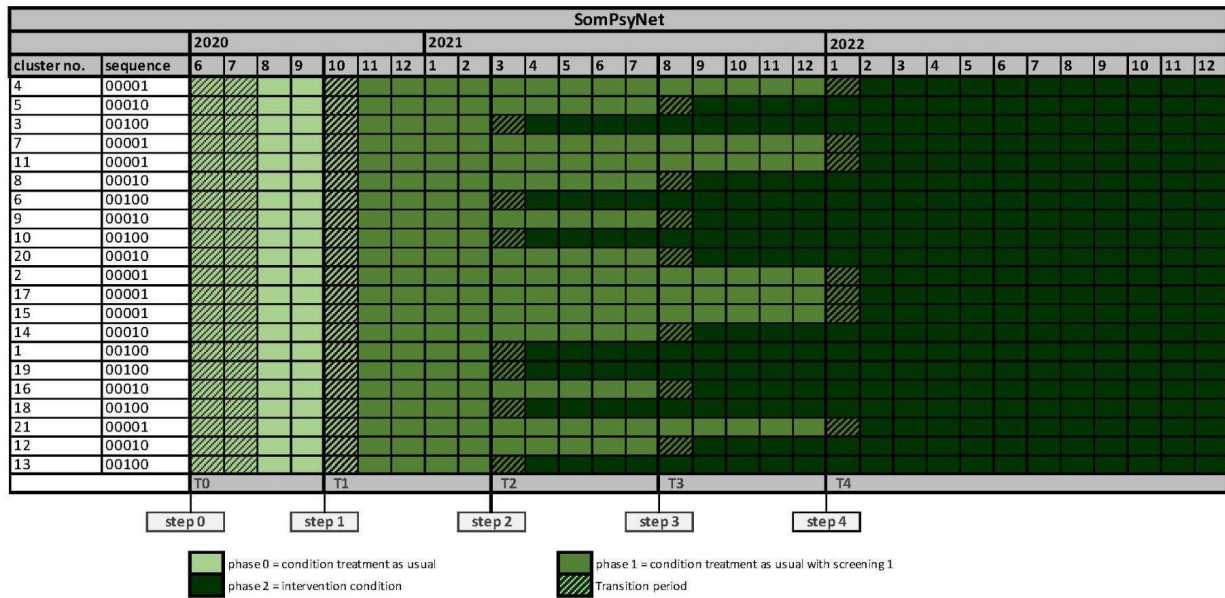

Figure – Schedule of the SomPsyNet stepped-wedge cluster randomised trial

Note. T0 to T4 denotes the time periods (T0, T1, T2, T3, and T4), i.e., the periods between the SW-CRT steps (or between the last step and the end of recruitment for the last period T4); The SW-CRT steps (step 0 to step 4) indicate the time at which some clusters switched from one phase to another phase. No. (number), SW-CRT (stepped-wedge cluster randomised trial).

## Supplementary material 2: Methodological details 1 – Time periods, sequences, sequence generation, allocation of sequences, concealment mechanism, implementation, and blinding

As outlined in the “Overview of SomPsyNet as Stepped and collaborative care model (SCCM) and research project” section of the main manuscript, the SomPsyNet study comprises three conditions, denoted “phase 0”, “phase I”, and “phase II”. As depicted in Supplementary material 1: Figure – Schedule of SomPsyNet stepped-wedge cluster randomised trial, all clusters started at the same time (at step 0) in phase 0 and transitioned at the same time (at step 1) from phase 0 to phase I. However, the timing of transitioning of a specific cluster from phase I to phase II could occur at different times (either at step 2, step 3 or step 4). Of note, this timing of transitioning from phase I to phase II was randomised: Some clusters transitioned from phase I to phase II at step 2, other clusters transitioned from phase I to phase II at step 3, and further clusters transitioned from phase I to phase II at step 4.

### *Time periods*

Time periods (T0, T1, T2, T3, and T4) are the periods between the Stepped-wedge cluster randomised trial (SW-CRT) steps (or between the last step and the end of recruitment for the last period T4); their time window notation refers to time since implementing the SW-CRT (from; to) (the schedule of the SW-CRT is displayed in the Figure provided as Supplementary material 1):

- T0 (start to month 4)
- T1 (month 5 to month 9)
- T2 (month 10 to month 14)
- T3 (month 15 to month 19)
- T4 (month 20 to month 31)

The SW-CRT steps are important to indicate the time at which some clusters switched from one phase to another phase.

- SW-CRT step 0 was the initiation of the study, i.e., switch to phase 0
- SW-CRT step 1 (switch from T0 to T1)
- SW-CRT step 2 (switch from T1 to T2 )
- SW-CRT step 3 (switch from T2 to T3 )
- SW-CRT step 4 (switch from T3 to T4 )

### *Sequences*

- The number of time periods of a specific cluster in a certain phase define the “sequence code”
- The sequence code defines the number of periods with the main comparator condition (in our case phase I) and the number of periods with the intervention condition (phase II); the periods from step 0 until step 1 represent phase 0.

- Several clusters could have the same sequence code.
- Examples: Sequence codes with 5 time periods, for clusters starting the intervention condition (phase II) with T2 / step 2, T3 / step 3, and T4 / step 4, respectively: “00100”, “00010”, “00001”.

### *Sequence generation, allocation of sequences, concealment mechanism, and implementation*

To balance the stepped-wedge design across the different study phases, participating wards were split up into one, two, or three clusters and grouped into triplets of clusters of roughly the same size (in terms of numbers of patients) and with similar patient populations. Within each triplet, the order in which the clusters went on to the implementation stage was randomly selected from all possible allocation sequences. The allocation sequence was computer-generated by an independent party (Department of Clinical Research, DKF) by using R software, based on the provision of involved clusters and cluster triplets. The DKF, as an independent party, stored the sequence allocations and split them into packs of information, each provided via HIN-secured email to the study coordinator.

### *Blinding*

Hospital employees who assigned patients to the wards and clusters were blinded to randomization.

Physicians and study nurses on the respective wards and clusters were trained before implementing phase I, since they had to implement three questions in their routine process. Yet, they were not informed about switching between phase I and phase II. Blinding of staff involved in the recruitment process was limited as phase I and phase II consisted of different study information and consent sheets. Trained staff performed the follow-up assessment, offering several assessment options, and repeatedly trying to reach out to the participants aiming at completing follow-up as far as possible, and we intended to blind them regarding the study phase allocation of the patients (if procedural aspects allowed it).

Unblinding was not planned as we did not expect the blinding to affect patients' health or treatment. Blinding only affected the recruitment process. Unblinding was only important for the study team itself and was needed due to procedural aspects.

**Supplementary material 3: Table – SomPsyNet study clusters**

| <b>SomPsyNet SCCM cluster</b>                                         | <b>Cluster number</b> |
|-----------------------------------------------------------------------|-----------------------|
| UHB: Department of Obstetrics and Gynecology 1.1                      | <b>1</b>              |
| UHB: Department of Obstetrics and Gynecology 1.2                      | <b>2</b>              |
| UHB: Department of Internal Medicine 5.1-1                            | <b>3</b>              |
| UHB: Department of Internal Medicine 5.1-2                            | <b>4</b>              |
| UHB: Department of Internal Medicine 5.1-3                            | <b>5</b>              |
| UHB: Department of Internal Medicine 6.2-1                            | <b>6</b>              |
| UHB: Department of Internal Medicine 6.2-2                            | <b>7</b>              |
| UHB: Department of Internal Medicine 6.2-3                            | <b>8</b>              |
| UHB: Department of Internal Medicine 7.1-1                            | <b>9</b>              |
| UHB: Department of Internal Medicine 7.1-2                            | <b>10</b>             |
| UHB: Department of Internal Medicine 7.1-3                            | <b>11</b>             |
| UAFFP: Department of Acute Geriatrics 1 / Rehabilitation Geriatrics 1 | <b>12</b>             |
| UAFFP: Department of Acute Geriatrics 2 / Rehabilitation Geriatrics 2 | <b>13</b>             |
| BESP: Department of Rheumatology.1                                    | <b>14</b>             |
| BESP: Department of Rheumatology.2                                    | <b>15</b>             |

|                                                                         |           |
|-------------------------------------------------------------------------|-----------|
| BESP: Department of Musculoskeletal Rehabilitation.1                    | <b>16</b> |
| BESP: Department of Musculoskeletal Rehabilitation.2                    | <b>17</b> |
| BESP: Department of Musculoskeletal Rehabilitation.3                    | <b>18</b> |
| BESP: Department of Gynecology (excl. Breast Centre and Obstetrics) 1.1 | <b>19</b> |
| BESP: Department of Gynecology (excl. Breast Centre and Obstetrics) 1.2 | <b>20</b> |
| UHB: Department of Internal Medicine 8.1                                | <b>21</b> |

*Note.* BESP (Bethesda Hospital), SCCM (Stepped and collaborative care model), UAFP (Department of Geriatric Medicine FELIX PLATTER), University Hospital Basel (UHB).

## Supplementary material 4: BAK-list (provided in German)

Page 1 (Angaben zum Patient)

**Angaben zur Patientin /  
zum Patient**

| Personalien    |            |
|----------------|------------|
| Anrede         | Frau       |
| Name           | Beispiel   |
| Vorname        | Beate      |
| Geburtsdatum   | 01.01.2001 |
| Dokumentencode | XXXX       |

  

| Testergebnisse                                                                                                                                                                                                                                                                                                                                                            |            |            |               |
|---------------------------------------------------------------------------------------------------------------------------------------------------------------------------------------------------------------------------------------------------------------------------------------------------------------------------------------------------------------------------|------------|------------|---------------|
| Datum Testung                                                                                                                                                                                                                                                                                                                                                             | 01.01.2023 |            |               |
|                                                                                                                                                                                                                                                                                                                                                                           | 1. Eingabe | 2. Eingabe | Check         |
| PHQ-8 Baseline                                                                                                                                                                                                                                                                                                                                                            | 15         | 15         | gleicher Wert |
| Depressivität (Patient Health Questionnaire (PHQ-8); Kroenke et al. 2001; Spannweite 0 bis 24, höherer Wert entspricht höherer Depressivität): Rohwert 15 -> Hinweise auf schwere depressive Symptomatik                                                                                                                                                                  |            |            |               |
| GAD-7 Baseline                                                                                                                                                                                                                                                                                                                                                            | 5          | 5          | gleicher Wert |
| Ängstlichkeit (Generalized Anxiety Disorder Scale (GAD-7); Löwe et al. 2008; Spannweite 0 bis 21, höherer Wert entspricht höherer Ängstlichkeit): Rohwert 5 -> Hinweise auf mild ausgeprägte Angstsymptomatik                                                                                                                                                             |            |            |               |
| SSD-12 Baseline                                                                                                                                                                                                                                                                                                                                                           | 24         | 24         | gleicher Wert |
| Psychische Belastung im Kontext körperlicher Beschwerden (Somatic Symptom Disorder Scale (SSD-12); Toussaint et al. 2019; Spannweite 0 bis 48, höherer Wert entspricht höherer psychischer Belastung einhergehend mit körperlichen Symptomen): Rohwert 24 -> Hinweis auf mindestens mittlere (mittelgradige) psychische Belastung einhergehend mit körperlichen Symptomen |            |            |               |

  

| Angaben zu den Konsilkontakten  |            |           |                      |                             |                                    |
|---------------------------------|------------|-----------|----------------------|-----------------------------|------------------------------------|
| Art des Kontakts                | Datum      | Uhrzeit   | Form                 | Kürzel Kons. Mitarbeiter*in | Qualifikation Kons. Mitarbeiter*in |
| 1. Kontakt                      | 02.01.2023 | 10.00 Uhr | stationär            | XX                          | Psycholog*in                       |
| 2. Kontakt                      | 04.01.2023 | 9.00 Uhr  | stationär            | XX                          | Psycholog*in                       |
| 3. Kontakt / tel. Nachbefragung | 28.01.2023 | 14.30 Uhr | ambulant telefonisch | XX                          | Psycholog*in                       |



Page 2a (Eingabemaske Problembereiche)

## Eingabemaske Problembereiche & spezifischer Angebotsbedarf

Zu welchen Themen wünschen Sie Angebotsvorschläge?

### A. Problembereiche

| Nr. | kognitive, psychische & psychosomatische Probleme                                          | Antworten<br>JA = 1 / Nein = 0 |
|-----|--------------------------------------------------------------------------------------------|--------------------------------|
| 1   | Symptome einer depressiven Störung                                                         | 1                              |
| 2   | Symptome einer Angststörung                                                                | 0                              |
| 3   | Symptome einer traumaassoziierten Störung                                                  | 0                              |
| 4   | Somatoforme Belastung                                                                      | 0                              |
| 5   | Chronische Schmerzsymptomatik                                                              | 0                              |
| 6   | Substanzkonsum, Substanzmissbrauch und Abhängigkeit                                        | 0                              |
| 7   | Problematisches Essverhalten                                                               | 0                              |
| 8   | Kognitive Beeinträchtigung                                                                 | 0                              |
| 9   | Delir                                                                                      | 0                              |
| 10  | Schwindel                                                                                  | 0                              |
| 11  | Tinnitus                                                                                   | 0                              |
| 12  | Sonstige Symptome einer psychischen Störung                                                | 0                              |
| 13  | Akute psychiatrische Belastung (inkl. Psychotische Symptome, Fremd- oder Selbstgefährdung) | 0                              |
| 14  | Symptome einer Zwangsstörung                                                               | 0                              |

| Nr. | Ambulante & stationäre Angebote für Patienten mit somatischen Erkrankungen | Antworten<br>JA = 1 / Nein = 0 |
|-----|----------------------------------------------------------------------------|--------------------------------|
| 15  | Lungenerkrankung                                                           | 0                              |
| 16  | Herzkrankung                                                               | 0                              |
| 17  | Multiple Sklerose                                                          | 0                              |
| 18  | Muskuloskelettale Erkrankungen                                             | 0                              |
| 19  | Rheumatische Erkrankung                                                    | 0                              |
| 20  | Parkinson                                                                  | 0                              |
| 21  | Endokrinologische Erkrankung                                               | 0                              |
| 22  | Hauterkrankung                                                             | 0                              |
| 23  | Onkologische Erkrankung                                                    | 0                              |



## Page 2b (Eingabemaske Problembereiche)

| Nr. | Soziale Probleme                               | Antworten<br>JA = 1 / Nein = 0 |
|-----|------------------------------------------------|--------------------------------|
| 24  | Fehlende Kinderbetreuung                       | 0                              |
| 25  | Erziehungsfragen bei minderjährigen Kindern    | 0                              |
| 26  | Partnerschaftskonflikte / Trennung / Scheidung | 1                              |
| 27  | Psychisch erkrankte Angehörige                 | 0                              |
| 28  | Einsamkeit / Wunsch nach Begleitung            | 0                              |
| 29  | Eingeschränkte Mobilität                       | 0                              |
| 30  | Gewalt                                         | 0                              |
| 31  | Migration                                      | 1                              |
| 32  | Obdachlosigkeit                                | 0                              |
| 33  | Wunsch nach Wohnbegleitung                     | 0                              |
| 34  | Streitigkeiten mit Vermieter / Nachbarn        | 0                              |
| 35  | Geldsorgen                                     | 0                              |
| 36  | Arbeitslosigkeit                               | 0                              |
| 37  | Wunsch nach beruflicher Beratung               | 0                              |
| 38  | Konflikte am Arbeitsplatz                      | 0                              |
| 39  | Körperliche Einschränkungen am Arbeitsplatz    | 0                              |

## B. Spezifischer Angebotsbedarf

| Nr. | Besondere Behandlungssituation      | Antworten<br>JA = 1 / Nein = 0 |
|-----|-------------------------------------|--------------------------------|
| 40  | Palliative Behandlungssituation     | 0                              |
| 41  | Angebote für ältere Patienten       | 0                              |
| 42  | Behinderung / Handicap              | 0                              |
| 43  | Besondere Bedürfnisse im Akutspital | 0                              |

| Nr. | Stationäre Behandlungsangebote                                  | Antworten<br>JA = 1 / Nein = 0 |
|-----|-----------------------------------------------------------------|--------------------------------|
| 44  | Stationäre psychosomatische Weiterbehandlung                    | 0                              |
| 45  | Stationäre psychiatrische/psychotherapeutische Weiterbehandlung | 0                              |

## Page 2c (Eingabemaske Problembereiche)

| <b>Nr.</b> | <b>Problembereich-übergreifende Angebote</b> | <b>Antworten<br/>JA = 1 / Nein = 0</b> |
|------------|----------------------------------------------|----------------------------------------|
| 46         | Entspannung                                  | 0                                      |
| 47         | Komplementärmedizin                          | 0                                      |
| 48         | Physiotherapie                               | 0                                      |
| 49         | Ernährungsberatung                           | 0                                      |
| 50         | Bewegungs-, Tanz-, Körpertherapie            | 0                                      |
| 51         | Musiktherapie                                | 0                                      |
| 52         | Kunsttherapie                                | 0                                      |
| 53         | Vernetzungswunsch mit anderen Betroffenen    | 0                                      |
| 54         | Tagesstruktur                                | 0                                      |
| 55         | Seelsorge                                    | 0                                      |
| 56         | Ambulante Psychotherapie                     | 0                                      |
| 57         | Ergotherapie                                 | 0                                      |
| 58         | Spitex                                       | 0                                      |

Page 3a (Ausgabe Empfehlungen)

## Ausgabemaske Anschlussinterventionen

| Mögliche Anschlussintervention - sortierte Reihenfolge |                                                                                                                              |                  |                      |                                      |                                           |
|--------------------------------------------------------|------------------------------------------------------------------------------------------------------------------------------|------------------|----------------------|--------------------------------------|-------------------------------------------|
| Rang                                                   | Art der Anschlussintervention                                                                                                | Anzahl Nennungen | Verlinkung           | Mit der/dem Patienten/in besprochen? | Möchte der/die Patient*in das aufgleisen? |
| 1                                                      | Schweizerisches Rotes Kreuz - Besuchs- & Begleitdienst für MigrantInnen im Seniorenalter                                     | 1                | <a href="#">Link</a> | Nein                                 | Nein                                      |
| 2                                                      | Beratungsstelle für Binationale Paare und Familien                                                                           | 1                | <a href="#">Link</a> | Ja                                   | Ja                                        |
| 3                                                      | GGG Migration - Übersetzungen, Information, Beratung                                                                         | 1                | <a href="#">Link</a> | Nein                                 | Nein                                      |
| 4                                                      | MUSUB- Transkulturelle Suchtberatungsstelle beider Basel                                                                     | 1                | <a href="#">Link</a> | Nein                                 | Nein                                      |
| 5                                                      | UPK Transkulturelle Ambulanz                                                                                                 | 1                | <a href="#">Link</a> | Nein                                 | Nein                                      |
| 6                                                      | Juristische Fakultät der Universität Basel - kostenlose Rechtsberatung für Familien                                          | 1                | <a href="#">Link</a> | Nein                                 | Nein                                      |
| 7                                                      | Pro Mente Sana - telefonische oder E-Mail Beratung für betroffene Menschen, deren Angehörige und nahestehende Bezugspersonen | 1                | <a href="#">Link</a> | Nein                                 | Nein                                      |
| 8                                                      | Stiftung Rheinleben - Beratung für Betroffene oder Angehörige von Betroffenen mit psychischen Erkrankungen                   | 1                | <a href="#">Link</a> | Nein                                 | Nein                                      |
| 9                                                      | Fabe (Familien-, Paar- und Erziehungsberatung) - Erziehungs- und Familienberatung & Beratungsangebot zu Finanzen             | 1                | <a href="#">Link</a> | Nein                                 | Nein                                      |
| 10                                                     | Sozialhilfe BS                                                                                                               | 1                | <a href="#">Link</a> | Nein                                 | Nein                                      |

## Page 3b (Ausgabe Empfehlungen)

|    |                                               |   |                      |      |      |
|----|-----------------------------------------------|---|----------------------|------|------|
| 11 | Zentrum Selbsthilfe Region Basel              | 1 | <a href="#">Link</a> | Nein | Nein |
| 12 | Ambulante/r Psychiater/in                     | 1 | <a href="#">Link</a> | Nein | Nein |
| 13 | Ambulante/r Psychotherapeut/in                | 1 | <a href="#">Link</a> | Ja   | Ja   |
| 14 | Psychosomatische Ambulanz (USB)               | 1 | <a href="#">Link</a> | Ja   | Nein |
| 15 | Entspannung (Angebot der Psychosomatik) (USB) | 1 | <a href="#">Link</a> | Nein | Nein |
| 16 | Sozialdienst (USB)                            | 1 | <a href="#">Link</a> | Nein | Nein |
| 17 |                                               |   | <a href="#">Link</a> | Nein | Nein |
| 18 |                                               |   | <a href="#">Link</a> | Nein | Nein |
| 19 |                                               |   | <a href="#">Link</a> | Nein | Nein |
| 20 |                                               |   | <a href="#">Link</a> | Nein | Nein |
| 21 |                                               |   | <a href="#">Link</a> | Nein | Nein |
|    |                                               |   |                      |      |      |

Page 4 (Koordination Aufgleisung)

## Koordination Aufgleisung

| Wer koordiniert die Aufgleisung?                                                                                                                     |                                                                                                                               |
|------------------------------------------------------------------------------------------------------------------------------------------------------|-------------------------------------------------------------------------------------------------------------------------------|
| Patient*in selber                                                                                                                                    |                                                                                                                               |
| Wer koordiniert ausserdem die Aufgleisung (falls vorhanden)?                                                                                         |                                                                                                                               |
|                                                                                                                                                      | <a href="https://www.sompsynet.bs.ch/koordinationsunterstuetzung">https://www.sompsynet.bs.ch/koordinationsunterstuetzung</a> |
| <b>Koordinationsunterstützung:</b>                                                                                                                   |                                                                                                                               |
| Hat der/die Patient*in Einverständnis für eine telefonische Nachbesprechung in zwei bis vier Wochen (je nach Krankheitsverlauf) mit ihm/ihr gegeben? |                                                                                                                               |
| Ja                                                                                                                                                   |                                                                                                                               |
| Soll der Konsilbericht an einen Arzt oder andere Fachperson des Vertrauens versendet werden?                                                         |                                                                                                                               |
| Ja                                                                                                                                                   |                                                                                                                               |
| Name und (falls vorhanden) Adresse?                                                                                                                  | Dr. Muster                                                                                                                    |
| Kommentare                                                                                                                                           |                                                                                                                               |
|                                                                                                                                                      |                                                                                                                               |

### Übersicht Koordinationsunterstützungsangebote

**Arbeitgeber:** Baloise Bank SoBa, Basler Kantonalbank inkl. Bank Cler, Böhlinger Ingelheim GmbH, CABB-Chemical AG, Kanton BS, Roche, Straumann AG, SUVA Basel, Weleda AG

**Stiftungen/Gesundheitsligen/Fachstellen:** Stiftung Rheinleben, Abteilung Sucht Kanton Basel-Stadt

**Versicherungen:** SWICA, Baloise Versicherung

Page 5 (Intervention Konsilgespräch)

## Interventionen im Konsilgespräch

| <b>Welche Interventionen haben Sie im Konsilgespräch angewendet?</b> |      |
|----------------------------------------------------------------------|------|
| Psychoedukation                                                      | Nein |
| Stützende und sicherheitsvermittelnde Gesprächsführung               | Ja   |
| Ressourcenaktivierung                                                | Nein |
| Motivierende Gesprächsführung                                        | Nein |
| Vermittlung von Bewältigungsstrategien                               | Nein |
| Entspannungsübung                                                    | Nein |
| Atemübung                                                            | Nein |
| Sonstiges                                                            |      |



## Page 6 (Telefonische Nachbesprechung)

## Telefonische Nachbesprechung

| Telefonisches Konsil (3. Termin: telefonische Nachbesprechung)                                                                             |                                                       |                           |
|--------------------------------------------------------------------------------------------------------------------------------------------|-------------------------------------------------------|---------------------------|
| Datum                                                                                                                                      | 28.01.2023                                            |                           |
| Uhrzeit                                                                                                                                    | 14.30 Uhr                                             |                           |
| Hat eine telefonische Nachbesprechung stattgefunden?                                                                                       | Ja                                                    |                           |
| Dauer des Gesprächs (in min)                                                                                                               | 12.00                                                 |                           |
| Wurden die folgenden besprochenen Angebote                                                                                                 |                                                       |                           |
| Rang                                                                                                                                       | Art des Angebots                                      | Antworten                 |
| 1                                                                                                                                          | Beratungsstelle für Binationale Paare und Familien    | Ja                        |
| 2                                                                                                                                          | Ambulante/r Psychotherapeutin<br>=> Wenn nein: Warum? | Nein<br>Zweifel am Nutzen |
| 3                                                                                                                                          |                                                       |                           |
| Wurden weitere Angebote genutzt?                                                                                                           |                                                       | Nein                      |
| Einschätzung der/des Konsildienstmitarbeitende*r: Denken Sie, dass die telefonische Nachfrage für die/den den Patient:innen hilfreich war? |                                                       | Ja                        |
| Kommentare                                                                                                                                 |                                                       |                           |



## Supplementary material 5: Methodological details 2 – Intervention

In phase II, every patient with a positive result of “screening 2” (i.e., scoring above threshold, which was the case if at least one of the three instruments, Depressive Symptom Scale with 8 items from the PHQ (PHQ-8), Generalised Anxiety Disorder, questionnaire with 7 items (GAD-7), and Somatic Symptom Disorder, questionnaire with 12 items (SSD-12) scored equal or above the predefined values that were based on previously validated cut-off scores of the respective instruments: PHQ-8  $\geq$  10; GAD-7  $\geq$  10; SSD-12  $\geq$  23) – if the physician in charge agreed – was offered the SomPsyNet intervention. The agreement of the physician was relevant, as interventions in the hospital need to be agreed upon by the responsible physician. This intervention was a stepped and collaborative care model (SCCM) centring around psychosomatic-psychiatric consultations.

These consultations were conducted by the well-established hospital psychosomatic-psychiatric consultation and liaison services (CL service). The CL services consisted of trained medical and psychological staff. In the Department of Geriatric Medicine FELIX PLATTER (UAFP), an advanced nursing practitioner was working in the psychiatric and social consultation team.

Typically, two fact-to-face consultations of approximately 40 minutes duration, and one telephone consultation of approximately 20 minutes duration about 4 to 6 weeks after hospital discharge took place; this could be reduced if not all three consultations were able to be implemented.

The basic structure of the consultations conducted within this study was the same as in the clinical routine and varied between the participating hospitals. The content of the consultations was customised to the patients' needs. There were some obligatory elements, which were implemented in the SomPsyNet phase II consultations at all hospitals. Typically, these elements consisted of an in-hospital part and an interface-related part to pave the way for further outpatient support:

### *In-hospital part:*

- **Telephone contact between the CL-staff and the ward physician** to discuss the consultation before and after.
- **Face-to-face consultations with the patient:** Typically, two face-to-face consultations with usually approximately 40 minutes duration took place during the hospital in-patient stay, usually in the patient's room. In case that consultations could not take place during the inpatient stay period, due to a rather short stay, outpatient consultations were offered, when possible and where feasible. These

outpatient consultation offers did not incur any costs for the patient. Objectives of the consultations were to establish a working alliance with the patient, to build an understanding of the psychosocial burden, and - if possible - to provide a first experience of relief, as well as to activate patient's resources and competencies. Besides a diagnostic assessment, the consultations aimed to jointly identify problem areas in which the patient needed and wanted support. Therefore, the involved CL staff asked the patients about current psychosocial stress factors.

- **“Support options catalogue” to link problem areas and service offers:** To support this process, we developed a Microsoft Excel-based clinical tool called the “BAK-list” (Behandlungs-Angebots-Katalog / support options catalogue) in the version for the University Hospital Basel (UHB). The BAK-list (see Supplementary material 4) consists of two main tables: One table contains a collection of relevant psychosocial issues often met in everyday clinical practice. The other table contains in-house and out-of-hospital services offering support for the different issues. These offers of support were individually linked to the psychosocial issues, so that by selecting a psychosocial issue, relevant offers of support were suggested. Thereby, the BAK-list facilitates generating suggestions for severity-stepped, need-based offers of support that the CL-service, in interaction with the patient, could then select, verify, and recommend. Further, the BAK-list is used as a documentation tool, facilitating reporting by providing standardised text-block templates adapted to the psychosocial issues and support offers. Every hospital adjusted the content of the BAK-list to their patients' needs and to their in-house offers of support. The following procedure applied: During a consultation, the CL-staff opens a new BAK-list file. The CL-staff then selects psychosocial stressors that currently affected the patient and for which the patient sought support. As an output, the BAK-list tool generates need-based support suggestions. The CL-staff is free to recommend these or other appropriate support options, tailored to the severity grade and the patient's needs.

*Interface-related part to pave the way for further outpatient support:*

- **Coordination person for implementing the recommendations:** If a patient consented to a support option, the CL-staff clarifies and documents who initiated contact with the chosen support provider and coordinated the care. As far as possible this is the patient herself/himself, prioritising self-management and self-responsibility. If she/he is not capable of performing that, another person such as the patient's general practitioner or a relative of the patient should be identified to coordinate the care. This process aims to reduce the gap between in-hospital and out-hospital support and to improve interface management.
- **Consultation report:** For each patient seen by the CL-staff in phase II, a consultation report with the recommendations is provided, either directly to the

patient or to the attending physician initiating the CL-service consultation, who is encouraged to integrate relevant parts of or the whole consultation report into the discharge letter – as far as the patient agreed with that. The patient can specify to whom the consultation or discharge report is sent after discharge from the hospital (e.g., general practitioner or another reference person). The consultation report is accompanied by a letter explaining the project context.

- **Online platform compiling support options:** Additionally, within SomPsyNet, we developed a platform in the form of a website that contained public offers of support services in the Basel region and partly also across cantons, facilitating identification and access to available services. Every patient in phase II is informed about this website. A leaflet in the form of a postcard helps to promote the platform.
- **Telephone consultation about 4 to 6 weeks after hospital discharge:** It is a well-known challenge that a substantial proportion of patients do not follow treatment recommendations after hospital discharge. To counteract this phenomenon, patients are offered a post-hospital intervention in form of a telephone consultation of approximately 20 minutes duration around 4 to 6 weeks after hospital discharge to support the take-up of the agreed on recommendations, to identify potential barriers for addressing them, and to find viable solutions for establishing contact with the support agency if use is still intended.

We do not prohibit any concomitant care and intervention during the trial. Notably, treatment as usual in the form of pre-SomPsyNet psychosomatic-psychiatric consultations is allowed.

We trained all psychosomatic-psychiatric consultation specialists involved in the study. Adherence to the intervention protocol is fostered by regular supervision and/or meetings to discuss any questions and upcoming issues regarding the intervention protocol. Further, the documentation of each psychosomatic-psychiatric consultation aims at increasing adherence to intervention protocols and facilitated monitoring of the respective adherence based on the written documentation.

## **Supplementary material 6: Methodological details 3 – Primary, secondary, and other outcomes, including healthcare economic outcomes**

### *Primary, secondary, and other outcomes*

The primary endpoint of our study is the change from the baseline of the ‘Mental Health Component Summary score’ of the Short Form 36 Health Survey (SF-36). The SF-36 was administered at study entry (‘baseline’ or ‘pre-assessment’) and at 6 months follow-up (‘follow-up’ or ‘post assessment’, conducted in the distressed and non-distressed subsamples).

The SF-36 is a widely used patient-reported outcome assessment tool to measure health-related quality of life and has high acceptability. The SF-36 is a standardised questionnaire with good psychometric properties (internal consistency reliability of 0.83-0.94)[1] and translated and validated in various languages, among them German[2]. It consists of 36-items to assess health-related quality of life using eight dimensions grouped into a physical and a mental component summary scale: The physical component summary (PCS) is calculated based on the four subdimensions physical functioning (PF, 10 items), physical role functioning (RP, 4 items), bodily pain (BP, 2 items), general health perception (GH, 5 items). The mental component summary of the SF-36 (MCS) is calculated based on the four subdimensions vitality (VT, 4 items), social role functioning (SF, 2 items), emotional role functioning (RE, 3 items) and mental health (MH, 5 items)[3,4]. Written instructions for the translational process, distribution, and evaluation are available and were clearly defined[2,5,6].

The SF-36 exists in two versions: version 1 and version 2, with the German version 2 being provided by Hogrefe[7,8]. Negotiations between the company ‘heartbeat medical’ and Hogrefe publisher regarding licence regulation issues were ongoing. Yet, based on the state of negotiations at that time, electronic integration of the SF-36 questionnaire version 2 within the heartbeat one system was not feasible in near future. Therefore, since electronic data collection was essential for continuous monitoring, quality control, and plausibility check of collected data, the available SF-36 version 1 is used for this study, which had been developed as a part of the Medical Outcomes Study (MOS) to report patient outcomes[3,5]. The secondary and other outcomes are provided in Table 1 of the main manuscript. Notably, the SF-36 PCS is part of the secondary endpoints.

We collect a range of sociodemographic variables, including age, sex, and socioeconomic status, work status and days out of work, length of hospital stay, ICD-10 diagnoses, Coronavirus disease 2019 (COVID-19) information, treatments, morbidity, disease history and severity of disease, as well as unintended effects of interventions, by questionnaire/interview and as part of the hospital routine data. These will be used amongst others to describe the study sample and as potential covariates for statistical analyses.

### *Healthcare economic outcomes*

Effects on costs were planned to be assessed from the perspectives of the Swiss statutory health insurance system, the patient, and society. Towards this end, medical resource use, direct and indirect costs will be examined. Specific endpoints include total costs of hospital treatment including additional medical, psychiatric or physiotherapeutic treatment during the patient's hospital stay, follow-up costs at treating hospitals, healthcare costs, patients' out-of-pocket expenses, and indirect costs due to reduced productivity. Relevant sub-categories of costs and key medical resource use are also included.

Health economic assessments will be based on hospital data, information provided by patients at the study visits, and health insurance claims data. The latter will be collected from a set of large health insurance providers with efficient electronic databases that are able to provide data in a standardised format. The claims data will be requested to cover the time period from 1 year before baseline assessment to baseline assessment, from baseline assessment until follow-up assessment, and from follow-up assessment until baseline assessment plus 3 years. Pre-baseline information from 1 year before baseline assessment to baseline assessment will be requested to serve as additional control variables. The data includes claims made to the Swiss statutory health insurance. They will be collected from the health insurance providers retrospectively after a reasonable waiting period ensuring sufficient completeness of the data, as patients and healthcare providers may submit reimbursement claims with delay.

**Supplementary material 7: Informed consent materials (provided in German)**

Page 1

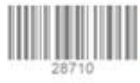

Phase 2

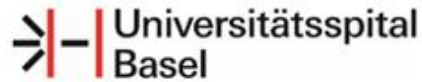

## Patienteninformation zur Studie SomPsyNet

---

**SomPsyNet**  
**Prävention psychosozialer Belastungsfolgen in der Somatik: ein  
Modellprojekt zur kollaborativen Versorgung**

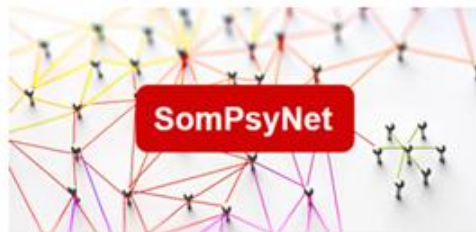

Studienorganisator: Prof. Dr. med. Rainer Schäfer

---

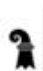

Gesundheitsdepartement des Kantons Basel-Stadt



## Page 2

**Sehr geehrte Patientin, sehr geehrter Patient**

Wir fragen Sie hier an, ob Sie bereit wären, an unserem Forschungsvorhaben mitzuwirken.

Ihre Teilnahme ist freiwillig. Alle Daten, die in diesem Projekt erhoben werden, unterliegen strengen Datenschutzvorschriften. Das Forschungsvorhaben wird durchgeführt von Prof. Dr. Rainer Schäfer. Bei Interesse informieren wir Sie gerne über die Ergebnisse aus dem Forschungsvorhaben.

In einem Gespräch erklären wir Ihnen die wichtigsten Punkte und beantworten Ihre Fragen. Damit Sie sich bereits jetzt ein Bild machen können, hier das Wichtigste vorweg. Im Anschluss folgen dann weitere, detaillierte Informationen.

**Warum führen wir dieses Forschungsvorhaben durch?**

- Wir wollen untersuchen, ob und wie stark sich Patientinnen und Patienten mit körperlichen Erkrankungen belastet fühlen, d. h. ob Sie gestresst, in Sorge oder unter Druck sind. Zudem wollen wir herausfinden, wie sich die Belastung, die Krankheitsverläufe und die Kosten 6 Monate und 3 Jahre nach Spitaleintritt entwickeln.
- Ergänzend bieten wir Patienten, bei denen wir eine bedeutsame psychosoziale Belastung feststellen, die Möglichkeit, ihre Belastungen in einem Gespräch mit einer Fachperson zu besprechen. Im entlastenden Gespräch werden gegebenenfalls Unterstützungsmöglichkeiten besprochen und wie diese genutzt werden können. Wir wollen untersuchen, ob die Gespräche und Unterstützungsmöglichkeiten den belasteten Patienten helfen.

**Was muss ich bei einer Teilnahme tun?**

- Wenn Sie sich entscheiden mitzumachen, dann erklären Sie sich einverstanden Fragen zur psychosozialen Belastung und oft damit verbundenen Lebensbereichen zu beantworten. Das Ausfüllen des Fragebogens dauert zirka 30 Minuten.
- Zeigt sich im Fragebogen eine bedeutsame psychosoziale Belastung, so wird Ihnen ein Gespräch mit einer entsprechenden Fachperson angeboten. Es können insgesamt bis zu zwei solcher Gespräche à je 40 Minuten in Anspruch genommen werden. Bei Bedarf kann zusätzlich eine telefonische Nachbesprechung à 20 Minuten geplant.
- Ein basierend auf den Angaben zur Belastung ausgewählter Teil der Studienteilnehmenden wird zudem 6 Monate danach erneut befragt, um den Verlauf zu untersuchen. Diese Nachbefragung dauert zwischen 30 und 60 Minuten.

**Welcher Nutzen und welches Risiko sind damit verbunden?****Nutzen:**

- Mit Ihrer Teilnahme an dieser Studie helfen Sie den beteiligten Spitälern, deren Forschung zum Wohle der Patienten zu fördern.
- Sie können einen persönlichen Nutzen von der Teilnahme haben, falls ein Gespräch zur psychosozialen Belastung stattfindet.

**Risiko und Belastung**

- Die Studienteilnahme ist mit keinerlei Risiken verbunden. Je nachdem werden Problembereiche angesprochen, was kurzfristig als unangenehm empfunden werden kann. Durch die professionelle Betreuung erwarten wir dadurch keine negativen Effekte oder Schäden.

Mit Ihrer Unterschrift am Ende des Dokuments bezeugen Sie, dass Sie freiwillig teilnehmen und dass Sie die Inhalte des gesamten Dokuments verstanden haben.



## Page 3

**Detaillierte Information****1. Ziel und Auswahl**

Körper und Seele hängen oft eng zusammen. Anhand dieser Studie wollen wir untersuchen, wie Patientinnen und Patienten während des Spitalaufenthaltes ihren Gesundheitszustand einschätzen. Zudem wollen wir herausfinden, wie sich die Belastung, die Krankheitsverläufe und die Kosten 6 Monate und 3 Jahre nach Spitaleintritt entwickeln.

Wir fragen Sie an, da alle Personen teilnehmen können, die ab einem bestimmten Datum auf einer Station aufgenommen wurden, welche sich an der Studie beteiligt. Ausserdem müssen sie mindestens 18 Jahre alt sein und ausreichend Deutsch verstehen. Nicht teilnehmen dürfen Personen, die onkologisch betreut werden.

**2. Allgemeine Informationen**

- Bei **SomPsyNet** soll für Patientinnen und Patienten aus **SOM**atischen Spitälern (Spitäler, in denen Patientinnen und Patienten wegen körperlichen Erkrankungen behandelt werden) zur Prävention **PSY**chosozialer Belastungsfolgen ein Versorgungs-**NET**zwerk aufgebaut und nachhaltig etabliert werden.
- Die Prävention hat zum Ziel, Krankheiten vorzubeugen, so dass man gar nicht erst krank wird; oder falls jemand bereits krank ist, möglichst schnell zu behandeln und negative Folgen der Krankheit zu verhindern.
- Psychosoziale Belastungsfolgen bedeutet bei SomPsyNet, dass jemand mit einer körperlichen Erkrankung auch psychisch oder sozial belastet ist. D.h. dass eine Person gestresst, in Sorge oder unter Druck ist. Häufig sind es Schwierigkeiten im Umgang mit folgenden Bereichen: körperliche Beschwerden oder Einschränkungen, emotionale Probleme (z.B. Traurigkeit, Depression, Ängste), Familie/Kinder/Freunde, Arbeit/Schule, Geld oder Lebenssinn/Spiritualität/Glaube. Patientinnen und Patienten mit psychosozialen Belastungen sollen bei SomPsyNet während des Spitalaufenthaltes systematisch erkannt und entsprechend behandelt werden.
- Informationen zu psychosozialen Belastungen werden der zuständigen Stationsärztin oder dem zuständigen Stationsarzt und dem weiteren Behandlungsteam weitergeleitet, um eine optimale und ganzheitliche Behandlung zu gewährleisten. Ausserdem werden Sie im Gespräch mit der Fachperson gefragt, ob wir den Konsilbericht, welcher unter anderem Informationen zu den aktuellen Belastungsfaktoren und den besprochenen Unterstützungsangeboten enthält, an den Hausarzt oder andere Nachbehandler weiterleiten dürfen.
- Die Datenerhebung der Studie dauert von Januar 2020 bis Dezember 2022. Wir erwarten ca. 3000 Teilnehmende im Gesamten.
- Um die gesundheitsbezogenen Kosten und die Kosten im Gesundheitssystem zu untersuchen, arbeiten wir mit ausgewählten Krankenversicherern zusammen. Es ist daher möglich, dass wir mit Ihrem Einverständnis Ihre Krankenversicherer kontaktieren, um Informationen über die Art Ihrer Versicherungen und die von Ihnen beanspruchte Leistungen und deren Kosten zu bekommen. Wir werden den Krankenversicherern ausser Ihren Kontaktdaten und Ihrer Einverständniserklärung keine persönlichen Informationen zukommen lassen.
- Diese Studie ist nach Schweizer Recht konzipiert. Zudem werden alle international anerkannten Richtlinien beachtet. Die zuständige kantonale Ethikkommission hat die Studie geprüft und bewilligt.
- Eine Beschreibung dieser Studie finden Sie auch auf der Internetseite des Bundesamtes für Gesundheit unter [www.kofam.ch](http://www.kofam.ch)

**3. Ablauf**

- Um die Belastung der Patientinnen und Patienten abzuklären, werden Sie während des Spitalaufenthaltes befragt. Dabei werden Ihnen Fragen zu Ihrem Gesundheitszustand, zu Ihrer Befindlichkeit, zu medizinischen Behandlungen, zu Ihrem Lebensumfeld und zur Lebensqualität gestellt. Falls im Fragebogen eine bedeutsame psychosoziale Belastung festgestellt wird, werden die Ergebnisse an die zuständige Stationsärztin oder den zuständigen Stationsarzt

## Page 4

weitergeleitet. Die zuständige Stationsärztin oder der zuständige Stationsarzt kann auf Ihren Wunsch ein Gespräch mit einer entsprechenden Fachperson anfordern. Im Gespräch werden aktuelle Problembereiche und mögliche Unterstützungsangebote besprochen. Je nach Bedarf können zwei solcher Gespräche à 40 Minuten stattfinden. Zusätzlich kann eine telefonische Nachbesprechung à 20 Minuten geplant werden.

- Ein Teil der Studienteilnehmenden wird zudem 6 Monate nach der ersten Befragung erneut befragt, um den Verlauf zu untersuchen. Sie erhalten die Fragebogen in Papierform, auf einem Tablet/Computer oder die Fragen werden Ihnen mündlich in einem Gespräch gestellt. Wenn Sie es wünschen, können wir Sie bei der Beantwortung der Fragen unterstützen. Dazu werden Sie von einem Studienmitarbeitenden kontaktiert.
- Im Rahmen Ihres Spitalaufenthaltes werden im Routineprozess Patientendaten zu Ihrer Gesundheit, aber auch zu administrativen Zwecken erfasst. Zu diesen Daten gehören Informationen zu Ihrer Person (wie z.B. Geschlecht, Geburtsdatum, Kontaktangaben, Nationalität), zu Ihrer Krankheitsgeschichte (wie z.B. Anamnese, Symptome und Diagnosen) und zu den Spitalstatistiken (wie z.B. Eintrittsdatum, Austrittsdatum, Liegezeit, Kosten, ökonomischer Schweregrad der Erkrankung). Wir dürfen diese Daten jedoch nur analysieren, wenn Sie hiermit Ihr Einverständnis dazu gegeben haben.
- Zeitlicher Aufwand durch die Studienteilnahme für die Patientin/den Patienten (immer Ihr Einverständnis vorausgesetzt) während des dreijährigen Prüfzeitraums:

|                                                                                               | <b>Befragung im Spital</b>                                                        | <b>6 Monate nach Studieneinschluss</b> | <b>3 Jahre nach Studienschluss</b> |
|-----------------------------------------------------------------------------------------------|-----------------------------------------------------------------------------------|----------------------------------------|------------------------------------|
| <b>Basisbefragung</b><br>(Selbstauskunft auf Papier / Tablet oder per Interview)              | 20-30 Minuten                                                                     |                                        |                                    |
| <b>Optional:</b><br><b>Gespräch mit Fachperson</b>                                            | 1 bis 2 Gespräche à 40 Minuten; bei Bedarf zudem ein Telefongespräch à 20 Minuten |                                        |                                    |
| <b>Nachbefragung</b><br>(Üblicherweise per Telefon)                                           |                                                                                   | 30-60 Minuten                          |                                    |
| <b>Daten der Krankenversicherer</b><br>(werden durch Studienpersonal angefragt und eingeholt) | Kein Zeitaufwand                                                                  | Kein Zeitaufwand                       | Kein Zeitaufwand                   |

#### 4. Nutzen

Mit Ihrer Teilnahme an dieser Studie helfen Sie den beteiligten Spitalern, deren Forschung zum Wohle der Patienten zu fördern.

Sie können einen persönlichen Nutzen von der Teilnahme haben, falls ein Gespräch zur psychosozialen Belastung stattfindet.

#### 5. Freiwilligkeit und Pflichten

Sie nehmen freiwillig teil. Wenn Sie nicht an dieser Studie teilnehmen oder später Ihre Teilnahme zurückziehen wollen, müssen Sie dies nicht begründen. Ihre medizinische Behandlung/Betreuung ist unabhängig von Ihrer Entscheidung gewährleistet. Sie dürfen jederzeit Fragen zur Studienteilnahme stellen. Kontaktdaten finden Sie am Ende dieser Studieninformation.

Als Teilnehmerin / als Teilnehmer ist es notwendig, dass Sie die Fragebogen jeweils wahrheitsgemäss nach Ihrem Befinden ausfüllen.



## Page 5

**6. Risiken und Belastungen**

Die Studienteilnahme ist mit keinerlei Risiken verbunden. Je nachdem werden Problembereiche angesprochen, was kurzfristig als unangenehm empfunden werden kann. Durch die professionelle Betreuung erwarten wir dadurch keine negativen Effekte oder Schäden.

**7. Alternativen**

Die Teilnahme an dieser Studie ist freiwillig. Wenn Sie nicht teilnehmen, hat dies keinen Einfluss auf Ihre medizinische Behandlung. Falls Sie sich Unterstützung im psychosozialen Bereich wünschen und nicht an der Studie teilnehmen wollen, wenden Sie sich bitte an die zuständige Stationsärztin oder den zuständigen Stationsarzt. Ihre Prüfperson kann Sie hierzu beraten.

**8. Ergebnisse**

Es gibt:

1. Individuelle Ergebnisse der Studie, die Sie direkt betreffen: Die Prüfperson wird Sie nach der Befragung über allfällige Anzeichen einer psychosozialen Belastung informieren. Sie können danach selbst entscheiden, ob Sie sich auf ein Gespräch mit einer entsprechenden Fachperson einlassen möchten oder nicht. Sie werden bei Bedarf über alle neuen Erkenntnisse informiert, welche den Nutzen der Studie oder Ihre Sicherheit beeinflussen können.
2. Objektive End-Ergebnisse der gesamten Studie: Am Ende der Studie können wir Ihnen eine Zusammenfassung der Gesamtergebnisse zukommen lassen.

**9. Vertraulichkeit der Daten und Proben**

Für diese Studie werden persönliche medizinische Daten und Versicherungsdaten erfasst. Bei der Datenerhebung zu Studienzwecken werden die Daten verschlüsselt. Verschlüsselung bedeutet, dass alle Bezugsdaten, die Sie identifizieren könnten (Name, Geburtsdatum), gelöscht und durch einen Schlüssel ersetzt werden.

Die Schlüssel-Liste bleibt immer bei den Studienverantwortlichen. Personen, die den Schlüssel nicht kennen, können daher keine Rückschlüsse auf Ihre Person ziehen. Ihr Name taucht niemals im Internet oder einer Publikation auf. Sämtliche Forschungsprojekte mit Ihren Daten unterliegen den in der Schweiz geltenden gesetzlichen Bestimmungen und müssen vorher von einer Ethikkommission bewilligt werden. Ihre Daten sind gemäss dem Schweizer Datenschutz nur berechtigten Personen des Projektes zugänglich. Alle Personen, die im Rahmen der Studie Einsicht in Ihre Daten haben, unterliegen der Schweigepflicht. Die Vorgaben des Datenschutzes werden eingehalten. Sie als teilnehmende Person haben jederzeit das Recht auf Einsicht in Ihre Daten.

Es ist möglich, dass Ihre Daten für andere Untersuchungen zu einem späteren Zeitpunkt weiterverwendet werden oder später an eine andere Datenbank in der Schweiz oder ins Ausland für noch nicht näher definierte Untersuchungen versandt und verwendet werden. Diese andere Datenbank muss die gleichen Standards einhalten wie die Datenbank zu dieser Studie. Für diese Weiterverwendung bitten wir Sie, ganz am Ende dieses Dokuments eine weitere Einwilligungserklärung zu unterzeichnen.

Möglicherweise wird diese Studie durch die zuständige Ethikkommission, die die Studie veranlasst hat, überprüft. Der verantwortliche Studienleiter (auch Prüfperson genannt) muss der Ethikkommission allenfalls Ihre persönlichen und medizinischen Daten für solche Kontrollen offenlegen.

**10. Rücktritt**

Sie können jederzeit von der Studie zurücktreten. Die bis dahin erhobenen Daten und Proben werden noch verschlüsselt ausgewertet, weil das ganze Projekt sonst seinen Wert verliert.

Nach der Auswertung werden Ihre Daten anonymisiert, d.h. Ihre Schlüsselzuordnung wird vernichtet, so dass danach niemand mehr erfahren kann, dass die Daten und Proben ursprünglich von Ihnen stammten. Dies dient vorrangig dem Datenschutz.

## Page 6

**11. Entschädigung für Teilnehmende**

Sie erhalten keine Entschädigung für Ihre Studienteilnahme.

Durch die Teilnahme entstehen Ihnen oder Ihren Krankenversicherern keine zusätzlichen Kosten. Falls es angezeigt ist, dass die Nachbefragung nicht per Telefon oder E-Mail, sondern vor Ort in einer unserer Kliniken durchgeführt wird, werden wir eine angemessene Transportkostenschädigung bezahlen. Vergütet werden öffentliche Verkehrsmittel 2. Klasse oder in äquivalenter Höhe Fahrkosten mit dem Auto. Sollte aus gesundheitlichen Gründen ein Taxi benötigt werden, bitten wir darum, die Kosten vorab von der Projektleitung genehmigen zu lassen.

Die Ergebnisse dieser Studie können unter Umständen dazu beitragen, kommerzielle Produkte zu entwickeln. Durch Ihre Studienteilnahme haben Sie kein Anrecht auf Anspruch an kommerziellen Entwicklungen (z. B. Patenten).

**12. Haftung**

Die jeweilige Institution, die für die Durchführung der Studie verantwortlich ist, haftet für Schäden, welche im Zusammenhang mit den Forschungshandlungen entstehen. Die Voraussetzungen und das Vorgehen dazu sind gesetzlich geregelt. Wenden Sie sich im Schadensfall an die Prüfperson.

**13. Finanzierung der Studie**

Die Studie wird mehrheitlich von Gesundheitsförderung Schweiz bezahlt.

**14. Kontaktperson(en)**

Sie dürfen jederzeit Fragen zur Studienteilnahme stellen. Auch bei Unsicherheiten oder Notfällen, die während der Studie oder danach auftreten, wenden Sie sich bitte an:

**Kontaktperson Universitätsspital Basel**

Prof. Dr. Rainer Schäferl,  
Klinik für Psychosomatik, Universitätsspital Basel  
Hebelstrasse 2, 4031 Basel  
Tel.: +41 61 328 59 79  
E-Mail: [sompsynet@usb.ch](mailto:sompsynet@usb.ch)

Page 7

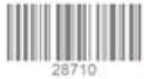

Phase 2

## SomPsyNet Einwilligungserklärung Studienprojekt

### Schriftliche Einwilligungserklärung zur Teilnahme an einem Studienprojekt

Bitte lesen Sie dieses Formular sorgfältig durch. Bitte fragen Sie nach, wenn Sie etwas nicht verstehen. Für die Teilnahme ist Ihre schriftliche Einwilligung notwendig.

|                                                                                                             |                                                                                                                             |
|-------------------------------------------------------------------------------------------------------------|-----------------------------------------------------------------------------------------------------------------------------|
| <b>BASEC-Nummer:</b>                                                                                        | 2019-01724                                                                                                                  |
| <b>Titel der Studie:</b>                                                                                    | SomPsyNet – Prävention psychosozialer Belastungsfolgen in der Somatik                                                       |
| <b>Studienorganisator – verantwortliche Person / Institution:</b>                                           | Chefarzt: Prof. Dr. med. Rainer Schäfert<br>Klinik für Psychosomatik<br>Universitätsspital Basel<br>Hebelstr. 2, 4031 Basel |
| <b>Ort der Durchführung:</b>                                                                                | Universitätsspital Basel                                                                                                    |
| <b>Verantwortliche Prüfperson am Studienort:</b><br>Name und Vorname in Druckbuchstaben:                    | .....                                                                                                                       |
| <b>Bitte beantworten Sie die Angaben in Druckbuchstaben und markieren Sie das Kästchen mit einem Kreuz.</b> |                                                                                                                             |
|                                                                                                             | <input type="checkbox"/> männlich <input type="checkbox"/> weiblich <input type="checkbox"/> anderes                        |
| Vorname                                                                                                     | .....                                                                                                                       |
| Name                                                                                                        | .....                                                                                                                       |
| Strasse, Nr.                                                                                                | .....                                                                                                                       |
| PLZ, Ort                                                                                                    | .....                                                                                                                       |
| Geburtsdatum (TT/MM/JJJJ):                                                                                  | .....                                                                                                                       |
| Telefonnummer:                                                                                              | .....                                                                                                                       |
| Mobilnummer:                                                                                                | .....                                                                                                                       |
| E-Mail Adresse:                                                                                             | .....                                                                                                                       |

- Ich wurde von der unterzeichnenden Prüfperson mündlich und schriftlich über den Zweck, den Ablauf der Studie und über mögliche Vor- und Nachteile sowie über eventuelle Risiken informiert.
- Ich nehme an dieser Studie freiwillig teil und akzeptiere den Inhalt der abgegebenen schriftlichen Information. Ich hatte genügend Zeit, meine Entscheidung zu treffen.



Page 8

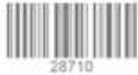

- Meine Fragen im Zusammenhang mit der Teilnahme an dieser Studie sind mir beantwortet worden. Ich behalte die schriftliche Information und erhalte eine Kopie meiner schriftlichen Einwilligungserklärung.
- Ich bevollmächtige die Studienleitung (Sponsor), von meinen Krankenversicherern die unmittelbar für den Studienzweck erforderlichen Informationen zur Art meiner Versicherungen, zu meinen Leistungsdaten und deren Kosten einzuholen. Diese Informationen beziehen sich auf die Beobachtungszeit der Studie (ab 1 Jahr vor dem Studieneinschluss bis 6 Monate danach) und auf die längerfristige Kostenentwicklung (bis 3 Jahre nach Studieneinschluss). Ich entbinde hierfür meine Krankenversicherer von ihrer gesetzlichen Schweigepflicht.
- Ich bin einverstanden, dass Fachleute der Studienleitung und der Ethikkommission Einsicht in meine unverschlüsselten Daten nehmen dürfen, unter strikter Einhaltung der Vertraulichkeit.
- Über Studienergebnisse, die direkt meine Gesundheit betreffen, werde ich informiert.
- Ich weiss, dass meine gesundheitsbezogenen und persönlichen Daten in verschlüsselter Form zu Forschungszwecken für diese Studie weitergegeben werden können (auch ins Ausland). Die Studienleitung (Sponsor) gewährleistet, dass der Datenschutz nach Schweizer Standard eingehalten wird.
- Im Fall einer Weiterbehandlung während des Prüfzeitraums ermächtige ich meine nachbehandelnden Ärzte, relevante Nachbehandlungsdaten der Prüfperson zu übermitteln.
- Ich kann jederzeit und ohne Angabe von Gründen von der Studienteilnahme zurücktreten. Meine medizinische Behandlung ist unabhängig von der Studienteilnahme immer gewährleistet. Die bis zum Rücktritt erhobenen Daten und Proben werden für die Auswertung der Studie verwendet.
- Falls Sie durch das Projekt einen Schaden erleiden sollten, haftet die Institution, welche das Projekt veranlasst hat und für die Durchführung verantwortlich ist.
- Ich verpflichte mich, die Fragen wahrheitsgetreu zu beantworten. Im Interesse meiner Gesundheit kann mich die Prüfperson jederzeit von der Studie ausschliessen.

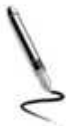**Ort, Datum:****Unterschrift Teilnehmer/in:**

\_\_\_\_\_

\_\_\_\_\_

**Bestätigung der Prüfperson:**

Hiermit bestätige ich, dass ich dieser Teilnehmerin/ diesem Teilnehmer Wesen, Bedeutung und Tragweite der Studie erläutert habe. Ich versichere, alle im Zusammenhang mit dieser Studie stehenden Verpflichtungen gemäss dem geltenden Recht zu erfüllen. Sollte ich zu irgendeinem Zeitpunkt während der Durchführung der Studie von Aspekten erfahren, welche die Bereitschaft der Teilnehmerin/ des Teilnehmers zur Teilnahme an der Studie beeinflussen könnten, werde ich sie/ ihn umgehend darüber informieren.

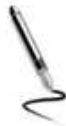**Ort, Datum:****Name, Vorname der Prüfperson in Druckbuchstaben**

\_\_\_\_\_

**Unterschrift der Prüfperson**

\_\_\_\_\_

\_\_\_\_\_

## SomPsyNet Einwilligungserklärung für Weiterverwendung von Daten dieser Studie

### Einwilligungserklärung für Weiterverwendung von Daten in verschlüsselter Form

**Bitte beantworten Sie die Angaben in Druckbuchstaben und markieren Sie das Kästchen mit einem Kreuz.**

männlich       weiblich       anderes

Name .....

Vorname .....

- Ich erlaube, dass meine Daten und Proben aus dieser Studie für die medizinische Forschung weiterverwendet werden dürfen. Dies bedeutet, dass meine Daten für zukünftige, noch nicht näher definierte Forschungsprojekte auf unbestimmte Zeitdauer verwendet werden dürfen. Diese Einwilligung gilt unbegrenzt.
- Ich entscheide mich freiwillig für eine Teilnahme und kann diesen Entscheid zu jedem Zeitpunkt wieder zurücknehmen. Wenn ich zurücktrete, werden meine Daten anonymisiert. Ich informiere lediglich meine Prüfperson und muss diesen Entscheid nicht begründen.
- Ich habe verstanden, dass die Daten verschlüsselt sind und der Schlüssel sicher aufbewahrt wird. Die Daten können im In- und Ausland an andere Datenbanken zur Analyse gesendet werden, wenn diese dieselben Standards wie in der Schweiz einhalten. Alle rechtlichen Vorgaben zum Datenschutz werden eingehalten.
- Normalerweise werden alle Daten gesamthaft ausgewertet und die Ergebnisse zusammenfassend publiziert. Sollte sich ein für meine Gesundheit wichtiges Ergebnis ergeben, ist es möglich, dass ich über meine Prüfperson kontaktiert werde. Wenn ich das nicht wünsche, teile ich es meiner Prüfperson mit. Wenn Ergebnisse aus den Daten kommerzialisiert werden, habe ich keinen Anspruch auf Anteil an der kommerziellen Nutzung.

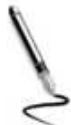

**Ort, Datum:**

**Unterschrift Teilnehmer/in:**

\_\_\_\_\_

\_\_\_\_\_

**Bestätigung der Prüfperson:** Hiermit bestätige ich, dass ich dieser Teilnehmerin/ diesem Teilnehmer Wesen, Bedeutung und Tragweite der Weiterverwendung von Daten erläutert habe.

**Ort, Datum:**

**Name, Vorname der Prüfperson in Druckbuchstaben**

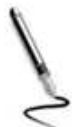

\_\_\_\_\_

**Unterschrift der Prüfperson**

\_\_\_\_\_

\_\_\_\_\_



### **Supplementary material 8: Methodological details 4 – Data recording and source data**

Data were collected by paper-pencil and by an online medical application called 'heartbeat one' from Heartbeat Medical Solutions GmbH. Heartbeat one was already implemented at the University Hospital Basel (UHB) and used in clinical practice. The server running heartbeat one for all three study sites was on a UHB server, maintained by the ICT-department of the UHB. All data assessed with heartbeat one as well as hospital information data used for this study purpose was transferred by the UHB ICT team to the project database in secuTrial®. SecuTrial® is an online Clinical Data management Application (CDMA, secuTrial® database) system based at the ICT-Department of the UHB.

All collected paper-pencil data of questionnaires, and hospital information that were not electronically available was entered into the study Electronic Case Report Form (eCRF) of secuTrial®. An audit trail maintained a record of initial entries and any changes made; time and date of entry; and username of the person authorising entry or change. The eCRF was implemented by the Data management group at the Department of Clinical Research (DKF). The Clinical Data Management System (CDMS) ran on a server maintained by the ICT-department of the UHB. Data entry was performed by trained staff. The CDMS was accessible via a standard browser on devices with an internet connection. The data transfer between clients and servers was encrypted using Transport Layer Security (TLS) cryptography protocol. Password protection and user-right management ensured that only authorised study investigators, monitors, data managers, and local authorities (if necessary) had access to the data during and after the study.

For quality assurance, the sponsor, the ethics committee, or an independent trial monitor could visit the research sites. Direct access to the source data and all study related files was granted on such occasions. All involved parties kept the participant data strictly confidential.

Back-up of the heartbeat one and secuTrial® database server are performed regularly according to established processes by the ICT-department of the UHB. The data managers of the DKF Basel implemented validation rules in the CDMS. When data got saved in an eCRF, they were validated for completeness and discrepancies. The data were reviewed by the responsible investigators. They raised queries using the query management system implemented in secuTrial®. Designated investigators had to respond to the query and confirm or correct the corresponding data. Thereafter the monitor could close the query. Health insurance claims data for patients with informed consent available are requested from participating health insurance providers.

## Supplementary material 9: Methodological details 5 – Statistics

### *Sample size*

Eligibility for participation in the SomPsyNet study was conditioned on provided informed consent. Based on a priori power analyses – see below – we aimed at an enrolled sample size of  $n =$  approximately 200–500 in phase 0;  $n = 1000$  in phase I; and  $n = 1000$  in phase II, assuming that at least 30% of enrolled patients would be in psychosocial distress (and followed up)). Of note, the rather large interval of the sample size of phase 0 was due to some uncertainties regarding the length of the initial transition phase and limited information on the number of patients eligible for study inclusion being admitted per month.

### *Statistical analysis plan and sample size calculation*

The primary endpoint of our study is the change from baseline of the Mental Health Component Summary score measured by the Short Form health survey questionnaire (SF-36). We made the following conservative assumptions: 1) 80% of those with psychosocial distress in the intervention condition (phase II, Stepped and collaborative care model (SCCM) condition) accepted receiving the SCCM (and none of them receive standard CL) 2) an effect of Hedges'  $g$  of 0.5 (based on published and unpublished reports[9] 3) 25% of those with psychosocial distress in the control condition (phase I, treatment as usual (TAU) condition) received standard CL-intervention; and 4) a Hedges'  $g$  of 0.5 in the control condition (phase I, TAU) receiving standard CL-intervention; we expected the following Hedges'  $g$  between the SCCM condition and TAU condition (delta Hedges'  $g$ ):  $\text{delta Hedges' } g = 0.8 * 0.5 - 0.25 * 0.5 = 0.275$ ). A priori power analysis based on t-test family tests for calculating differences between two independent means (with  $\alpha = 0.05$ ) indicated that a sufficient power of  $1 - \beta = 0.80$  would be achieved if 209 participants per condition were included. Notably, the sample size needed to allow for an anticipated drop-out rate to reach sufficient power for both intent-to-treat and per-protocol analyses. Assuming a rate of drop-out and missing data due to other reasons of 25% (given that follow-up was conducted at baseline and 6 months and a rather morbid study sample), we needed to include 279 patients per condition in the main analyses on the treatment effects of the SCCM (i.e., comparing the outcomes of subjects in the distressed subsamples of phase II vs. phase I). Based on preliminary analyses of data from study phase 0, we expected that approximately 30–35% (more than the 20%, initially anticipated based on the literature[10]) of patients with somatic disease included in the study were psychosocially distressed. Leaving some uncertainty margin, we therefore expected that these 279 patients per condition could be achieved with a total subject pool of  $N = 2000$  included in the study phases I and II ( $n = 1000$  (300 distressed) in phase I and  $n = 1000$  (300 distressed) in phase II)[11,12].

Given the complex nature of the stepped-wedge design, additional power simulations were conducted in Stata to ensure the proposed sample sizes would be sufficient to achieve 0.8 power under the assumptions stated above.

The statistical power for medical resource use and cost parameters was difficult to establish due to issues such as large background variability and unknown distribution of confounding baseline characteristics[13]. For these analyses, we used the largest achievable sample sizes to be as much as possible on the safe side. This implied to include all enrolled patients in the related analyses based on hospital information data, and all meeting the specific eligibility criteria for the analyses based on health insurance claims data.

### *Descriptive analyses*

Descriptive statistics of study sample characteristics, study condition parameters such as participation rate, and mental health factors by allocated sequence, phase, and period will be calculated following the Stepped-wedge cluster randomised trial (SW-CRT) guidelines[14], and appropriate indicators of central tendency and dispersion will be reported, depending on variable scale and distribution.

### *Estimation of intervention effects on primary, secondary, and other outcomes*

- To estimate intervention effects, we intend to primarily conduct generalised linear mixed models of primary, secondary, and other outcome parameters adjusted for the clusters as random effects and for study conditions, calendar time and potential confounders (e. g., gender, age categories, socioeconomic status) as fixed effects. Of note, as the comparison of phase II versus phase I was randomised, we did not expect confounding *ex ante* for respective comparisons, as we do not expect that patient characteristics potentially predictive of the outcome are somehow associated with the timing of the rollout. Still, we intend to include covariates to improve fitting the model with greater precision. The exact choice of regression method will consider the distributional characteristics of the outcome parameters of interest. As mediators, we primarily intend to assess uptake of the CL-service offers and recommendations. As dependency of stepped wedge trial results on choice of statistical techniques had been reported, alternative analytical methods may additionally be used for sensitivity checks[15].
- Intervention effects will be estimated, using the distressed subsample only, contrasting program exposures in Phases I and II.

Analysis of outcome parameters representing medical resource use and costs will follow these steps:

- Description of cluster characteristics, contrasting trial-level cluster size etc., and cluster size considering the actual number of observations with health insurance claims data available[16]. This will be accompanied by a CONSORT-type flowchart[14].
- Description of individual-level sociodemographic and disease characteristics per intervention phase[16].
- Naïve comparison of outcome parameter values between intervention phases.
- Generalised linear mixed models of outcome parameters with random effects for the clusters and fixed effects for intervention phases, calendar time, and potential confounders (such as somatic morbidity characteristics, insurance model, etc.)[16,17,18]. The exact choice of regression method will consider the distributional characteristics of the outcome parameters of interest. (For medical resource use and cost outcomes, left-skewed distributions are expected.) As dependency of stepped wedge trial results on choice of statistical technique had been reported, alternative analytical methods may additionally be used for sensitivity checks[15].
- An additional step will combine the results of the above-described analyses, and especially of the analysis of total healthcare costs over 6 months, with estimates of the per-person cost of the SCCM intervention that will be derived as part of the SomPsyNet project but outside the study addressed here. This will allow us to approximate the net cost of the SCCM intervention. The stability of results will be assessed based on the variation of parameter values, using 95% confidence limits where available. Additional estimates of the proportion of patients with psychosocial distress will enable us to perform a rough estimation of the budget impact of the SCCM, at the level of canton Basel-Stadt and at the national level.

We will conduct additional statistical analyses i) to compare data from phases II and I vs. phase 0 to estimate the potential effects of introducing parts of screening 1 without consequences ii) to estimate the prevalence of psychosocial distress among somatic hospital patients, iii) to estimate the performance criteria of the screening procedure to identify psychosocially distressed subjects, and iv) to estimate differences in outcome parameter trajectories and costs between distressed and non-distressed subjects, by comparison of subjects in the distressed subsample with those of the non-distressed subsample.

To the extent applicable, all reporting follows the rules of the extension of the CONSORT statement to stepped-wedge cluster randomised trials[14].

### *Minimising and handling of missing data and drop-outs*

First, our strategy combines minimising of missing data bias by careful planning of the questionnaire order (most important outcomes at the beginning); active data management for quality assurance in terms of tight monitoring of planned activities/progress and results and identifying problems as early as possible; and active review of missing data to collect answers when re-contact was planned. Using digital assessment tools should further reduce missing data.

It is essential to distinguish between missing data due to partial participation (drop-outs, withdrawal) and loss to follow-up (death or severe medical health status/diseases). Inclusion of loss to follow-up reasons for example based on the patient complexity level will be taken into account when conducting statistical methods such as inverse probability weighting and multiple imputation by chained equations (MICE). Whenever possible, full complete analyses will be performed including adjustment for proxies of missing data such as age, patient complexity level, and socioeconomic status, and whenever appropriate multiple imputation will be performed. We intend to conduct intention to treat (ITT) as well as per protocol analyses.

**Supplementary material 10: Table – Causality assessment of Serious Adverse Events (SAEs) based on International Council for Harmonisation of Technical Requirements for Pharmaceuticals for Human Use (ICH) E2A guidelines**

*Causality assessment of SAEs based on ICH E2A guidelines*

| <b>Relationship</b> | <b>Description</b>                                                                                                       |
|---------------------|--------------------------------------------------------------------------------------------------------------------------|
| Definitely          | Temporal relationship<br>Improvement after dechallenge<br>Recurrence after rechallenge<br>(or other proof of drug cause) |
| Probably            | Temporal relationship<br>Improvement after dechallenge<br>No other cause evident                                         |
| Possibly            | Temporal relationship<br>Other cause possible                                                                            |
| Unlikely            | Any assessable reaction that does not fulfill the above conditions                                                       |
| Not related         | Causal relationship can be ruled out                                                                                     |

*Note.* Source of table: [19]; SAE (Serious Adverse Event), ICH E2A (International Council for Harmonisation of Technical Requirements for Pharmaceuticals for Human Use).

## Supplementary material 11: Methodological details 6 – Ethics and Dissemination

### *Monitoring*

Source data/documents are accessible to monitors and questions are answered during monitoring. Given the anticipated low risk of the intervention, we did not establish a data monitoring committee (DMC), nor did we implement regular interim analysis or related stopping guidelines. However, the sponsor and investigator could terminate the study prematurely according to certain circumstances, e.g. insufficient participant recruitment, alterations in accepted clinical practice that would have made the continuation of the study unwise, or early evidence of harm or benefit of the experimental intervention.

### *Risk of harms*

Participation in the study was not expected to be associated with relevant risks. In the questionnaires or in the consultation contacts problem areas may be explored for the benefit of the patient that could be perceived as unpleasant for a short time. All applied questionnaires were validated, widely accepted, and routinely applied in research and clinical practice. Consultations were conducted by qualified professionals under appropriate supervision. Hence, the risk-benefit assessment was positive.

Given the large number of hospital inpatients with somatic diseases that were included in this study, we expected that several Serious Adverse Events (SAEs)[20] would occur during the course of the study at the different included study sites (e.g., among the patients hospitalised for cardiac diseases: life-threatening events requiring prolongation of existing hospitalisation and resulting in disability). Given the very low probability of a causal relation between study procedures (e.g., collection of self-reported data) and any such events, we do not conduct routine causality assessments of all SAEs, with the exception of SAEs related to suicide attempts or completed suicide. In these cases, both investigator and sponsor conduct a causality assessment of these events to the trial intervention (see table in Supplementary material 10 for terms given in International Council for Harmonisation of Technical Requirements for Pharmaceuticals for Human Use (ICH E2A) guidelines[19]). We classify any event assessed as “possibly”, “probably” or “definitely” related to the trial intervention. Further, both investigator and sponsor make a severity assessment of these events as mild, moderate, or severe. “Mild” meant the complication is tolerable, “moderate” meant it interferes with daily activities, and “severe” meant it renders daily activities impossible.



### *Reporting of SAEs*

All SAEs related to suicide attempts or completed suicide are documented and reported immediately (within a maximum of 24 hours after respective information was provided to study staff) to the sponsor of the study.

If it is not possible to exclude that a SAE is attributable to the intervention under investigation, the investigator reports it to the ethics committee via Business Administration System for Ethical Committees (BASEC) within 15 days. If a SAE occurs at one of the study sites, the coordinating investigator reports the event to the ethics committee concerned, within 15 days. If a SAE related to suicide attempts or completed suicide occurs, we would interrupt the research project and notify the Ethics Committee on the circumstances via BASEC within 7 days according to HRO Art. 21[21].

### *Auditing*

Regular internal audits (usually once a year; with additional visits if needed) were conducted at each study site by trained and experienced staff (i.e., knowledge of Good Clinical Practice) of the principal study site under the supervision of the operative study manager. All study procedures, including participant recruitment, verification of eligibility, consent, enrolment, and allocation to study conditions were reviewed. Before each study phase, the study staff was prepared and trained. All study sites were in regular exchange through monthly meetings. Data managers regularly check completeness, accuracy, and timeliness of data collection and filing. The final database, using the software secuTrial®, provides an implemented data audit trail feature.

### *Overall ethical considerations*

The SomPsyNet study is conducted in compliance with the protocol, the current version of the Declaration of Helsinki[22], the International Council for Harmonisation of Technical Requirements for Pharmaceuticals for Human Use - Good Clinical Practice (ICH-GCP)[23], the Human Research Act (HRA)[24], as well as other locally relevant legal and regulatory requirements. Participation of study participants is voluntary and written informed consent prior to participating in the study was obtained and can be withdrawn at any time.

### *Protocol amendments*

Any modifications to the protocol which might impact the conduct of the study, the potential benefit of the patients, or might affect patient safety, including changes in study objectives, study design, patient population, sample sizes, study procedures, or significant administrative aspects require a formal amendment to the protocol. Until 31-05-2023, four amendments were submitted to and approved by the 'Ethikkommission Nordwest- und Zentralschweiz' (EKNZ; approval dates: 04-06-2020, 08-01-2021, 11-02-2021, and 27-07-2021). Protocol modifications and administrative changes of the protocol were discussed among the principal investigators. In regular quality management meetings, the operational study management informed the study staff of all study sites in case of relevant protocol modifications.

### *Consent or assent*

Trained Research Nurses and trained master students in psychology, with a completed bachelor's degree in psychology introduced the trial to patients. Patients also received information sheets. Patients had the opportunity for questions or queries at any time and sufficient time to form an opinion. Study staff obtained written consent from patients willing to participate in the trial. In addition, patients were asked to agree by signing the informed consent that study investigators collected health insurance claims data directly from the insurer to analyse health resource use and costs. If informed consent for further use of study data was obtained, study data can be further used for other projects.

If consent is revoked, no further data are collected. Already collected data of the person concerned will no longer be transferred to the study database. In case that data were already transferred and fully coded at time of revoking the consent, encoded data will be retained and analysed. The opportunity to receive treatment as usual (TAU) remains for any subject who has withdrawn from the study.

### *Confidentiality and coding*

The list of participants with given informed consent is stored on a secure University Hospital Basel (UHB) server maintained by the ICT-department and the trial and participant data are handled with uttermost discretion and are only accessible to authorised personnel, who need data access to fulfil their duties within the scope of the study. Back-up of the UHB server is performed regularly according to established processes by the ICT-department of the UHB.

As soon as possible after data collection, the Case Report Forms (CRFs) and other study specific documents are encoded, and the participants are henceforth only identified by a unique participant number. Once all data are entered into the CDMS and monitoring is completed, the secuTrial® database will be locked and closed for further data entry. The complete dataset will then be exported and transferred to the study statistician as well as the principal investigator. Other members of the study team (e.g., health economist) will receive access to the data, as required for analytical tasks.

For the collection of health insurance claims data, the contact details, copies of signed informed consent forms and social insurance number of consenting, eligible patients are sent to the participating health insurance providers, together with a code that can be unequivocally matched with the study's unique participant number. The health insurance providers select and calculate the required variables. Together with the above-mentioned code, they are asked to return these for integration with the main study database.

## Supplementary material 12: References of the Supplementary material

- 1 Gandek B, Sinclair SJ, Kosinski M, *et al.* Psychometric evaluation of the SF-36 health survey in Medicare managed care. *Health Care Financ Rev* 2004;25:5–25.
- 2 Bullinger M, Alonso J, Apolone G, *et al.* Translating health status questionnaires and evaluating their quality: the IQOLA Project approach. International Quality of Life Assessment. *J Clin Epidemiol* 1998;51:913–23. doi:10.1016/s0895-4356(98)00082-1
- 3 Stewart AL, Hays RD, Ware JE. The MOS short-form general health survey. Reliability and validity in a patient population. *Med Care* 1988;26:724–35. doi:10.1097/00005650-198807000-00007
- 4 Ware JE, Sherbourne CD. The MOS 36-item short-form health survey (SF-36). I. Conceptual framework and item selection. *Med Care* 1992;30:473–83.
- 5 Stewart AL, Greenfield S, Hays RD, *et al.* Functional status and well-being of patients with chronic conditions. Results from the Medical Outcomes Study. *JAMA* 1989;262:907–13.
- 6 Ware JE, Kosinski M, Gandek B, *et al.* The factor structure of the SF-36 Health Survey in 10 countries: results from the IQOLA Project. International Quality of Life Assessment. *J Clin Epidemiol* 1998;51:1159–65. doi:10.1016/s0895-4356(98)00107-3
- 7 Rand Health Care. 36-Item Short Form Survey from the RAND Medical Outcomes Study - version 1, 2020. Available: [https://www.rand.org/health-care/surveys\\_tools/mos/36-item-short-form.html](https://www.rand.org/health-care/surveys_tools/mos/36-item-short-form.html) [Accessed 22 Jan 2020].
- 8 Morfeld M, Kirchberger I, Bullinger M. *SF-36 - Fragebogen zum Gesundheitszustand – Version 2, ergänzte und überarbeitete Auflage*. Hogrefe Verlag, 2011. Available: <https://www.testzentrale.ch/shop/fragebogen-zum-gesundheitszustand.html> [Accessed 22 Jan 2020].

- 9 Richards DA, Hill JJ, Gask L, *et al*. Clinical effectiveness of collaborative care for depression in UK primary care (CADET): cluster randomised controlled trial. *BMJ* 2013;347:f4913. doi:10.1136/bmj.f4913
- 10 Tuch A. *Somatisch-psychische Komorbidität in Schweizer Akutspitälern. Prävalenz und Inanspruchnahme (OBSAN Bulletin 01/2018)*. Neuchâtel: Schweizerisches Gesundheitsobservatorium, 2018.
- 11 Donner A, Klar N. *Design and Analysis of Cluster Randomization Trials in Health Research*. Hoboken: Wiley, 2000.
- 12 Hayes RJ, Moulton LH. *Cluster Randomised Trials*. 2nd edn. Boca Raton: CRC Press, 2017.
- 13 Cohen J. *Statistical power analysis for the behavioral sciences*. 2nd edn. Hillsdale, NJ: Lawrence Erlbaum Associates, 1988.
- 14 Hemming K, Taljaard M, McKenzie JE, *et al*. Reporting of stepped wedge cluster randomised trials: extension of the CONSORT 2010 statement with explanation and elaboration. *BMJ* 2018;363:k1614. doi:10.1136/bmj.k1614
- 15 Hussey MA, Hughes JP. Design and analysis of stepped wedge cluster randomized trials. *Contemp Clin Trials* 2007;28:182–91. doi:10.1016/j.cct.2006.05.007
- 16 Hemming K, Haines TP, Chilton PJ, *et al*. The stepped wedge cluster randomised trial: rationale, design, analysis, and reporting. *BMJ* 2015;350:h391. doi:10.1136/bmj.h391
- 17 Pearse R. *Enhanced Peri-Operative Care for High-risk patients (EPOCH) Trial: A stepped wedge cluster randomised trial of a quality improvement intervention for patients undergoing emergency laparotomy [PDF]*. London: Queen Marys University of London, 2013.
- 18 McCulloch CE, Searle SR, Neuhaus JM. *Generalized, Linear, and Mixed Models*. 2nd edn. Hoboken: John Wiley & Sons, 2008.

- 19 International Conference on Harmonisation of technical requirements for registration of pharmaceuticals for human use, ICH Expert Working Group. *ICH harmonised tripartite guideline. Clinical safety data management definitions and standards for expedited reporting E2A*. 1994.
- 20 The Swiss Federal Council. Ordinance on Clinical Trials in Human Research (ClinO): SR 810.305 - Verordnung vom 20. September 2013 über klinische Versuche mit Ausnahme klinischer Versuche mit Medizinprodukten (Verordnung über klinische Versuche; KlinV), 2013. Available: <https://www.admin.ch/opc/de/classified-compilation/20121176/index.html> [Accessed 22 Jul 2019].
- 21 The Swiss Federal Council. 810.301- Ordinance of 20 September 2013 on Human Research with the Exception of Clinical Trials, 2013. Available: <https://www.fedlex.admin.ch/eli/cc/2013/642/en> [Accessed 22 Jul 2019].
- 22 World Medical Association (WMA). WMA Declaration of Helsinki – Ethical Principles for Medical Research Involving Human Subjects, 2019. Available: <https://www.wma.net/policies-post/wma-declaration-of-helsinki-ethical-principles-for-medical-research-involving-human-subjects/> [Accessed 31 Jul 2019].
- 23 International Conference on Harmonization (ICH). *ICH: E6 (R2): Guideline for good clinical practice [PDF]*. London: European Medicines Agency, 2016.
- 24 The Swiss Federal Council. 810.30 Federal Act of 30 September 2011 on Research involving Human Beings (Human Research Act, HRA), 2019. Available: <https://www.admin.ch/opc/en/classified-compilation/20061313/index.html> [Accessed 31 Jul 2019].
